# Supplementary material for: Influence of Bone Substitutes on Mesenchymal Stromal Cells in an Inflammatory Microenvironment
Source: MDPI journal article supplement (doi:10.3390/ijms24010438), 2022-12-27
Supplement: s1 [file s1]

Supplementary data

Supplementary Figure S1

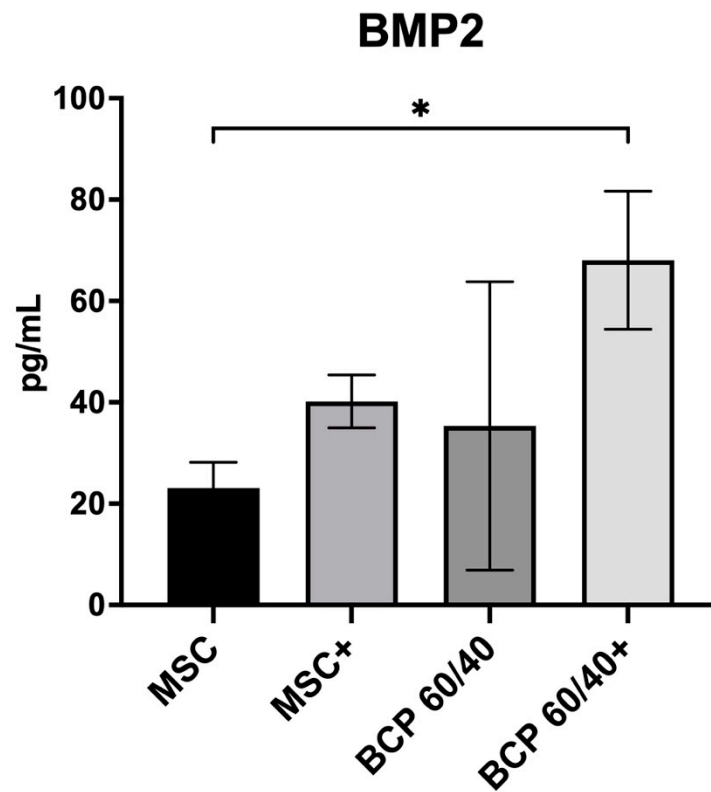

**Figure S1:** ELISA for BMP2 protein. Concentration of BMP2 protein in different culture conditions after 72 h; + indicates cytokine stimulation. Data represent mean  $\pm$  SD; \*  $p < 0.05$ .

## Supplementary Figure S2

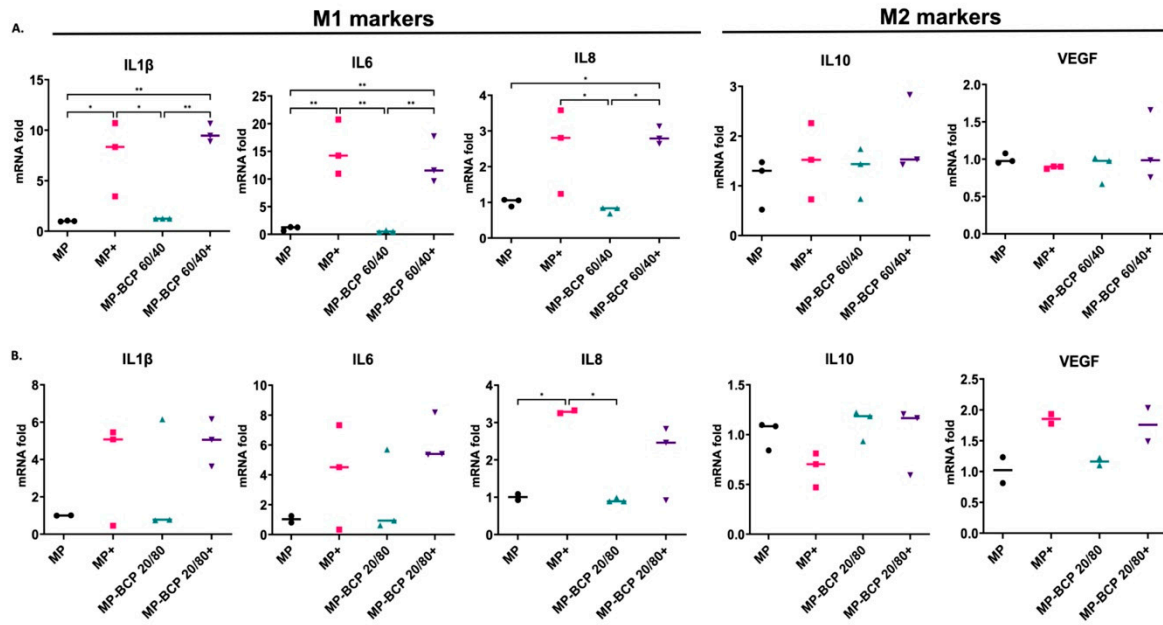

**Figure S2:** Relative mRNA expression (fold changes) of M1 and M2 related genes in MP cultured with MSC seeded on BCP 60/40 (A) or BCP 20/80 (B) (n = 3). MP, monolayer MSC cocultured with MP; + represents cytokine stimulation. Statistical analyses are based on one-way ANOVA with Tukey's multi comparison tests on delta-Ct values; \*  $p < 0.05$ ; \*\*  $p < 0.001$ ; \*\*\*  $p = 0.0001$ ; \*\*\*\*  $p < 0.0001$ .

**Supplementary Table S1: Real time PCR primers used in the study**

| <b>Gene</b>           | <b>TaqMan® Assay ID</b> | <b>Amplicon length</b> |
|-----------------------|-------------------------|------------------------|
| <b>Reference gene</b> |                         |                        |
| GAPDH                 | Hs 02758991_g1          | 93                     |
| <b>Osteogenesis</b>   |                         |                        |
| RUNX2                 | Hs01047973_m1           | 86                     |
| BMP2                  | Hs00154192_m1           | 60                     |
| <b>Healing</b>        |                         |                        |
| VEGF                  | Hs00900055_m1           | 59                     |
| IL10                  | Hs00961622_m1           | 74                     |
| <b>Inflammation</b>   |                         |                        |
| IL6                   | Hs00174131_m1           | 95                     |
| IL8                   | Hs00174103_m1           | 101                    |
| <b>Remodeling</b>     |                         |                        |
| RANKL (TNFSF11)       | Hs00243522_m1           | 67                     |
| OPG (TNFRSF11B)       | Hs00900358_m1           | 74                     |

GAPDH glyceraldehyde 3-phosphate dehydrogenase, RUNX2 runt-related transcription factor 2, BMP2 bone morphogenetic protein 2, VEGF, vascular endothelial growth factor, IL6 interleukin 6, IL8 interleukin 8, IL10 interleukin 10, RANKL Receptor activator of nuclear factor kappa-B ligand, OPG osteoprotegerin.

**Supplementary Table S2: Multiplex cytokine assay panel**

| <b>Abbreviation</b> | <b>Cytokine</b>                                  |
|---------------------|--------------------------------------------------|
| bFGF/FGF2           | Basic fibroblast growth factor                   |
| GCSF                | Granulocyte colony stimulating factor            |
| GMCSF               | Granulocyte-macrophage colony-stimulating factor |
| Eotaxin/CXCL1       | Eotaxin-1                                        |
| IL1 $\beta$         | Interleukin 1 beta                               |
| IL1ra               | Interleukin 1 receptor a                         |
| IL2                 | Interleukin 2                                    |
| IL4                 | Interleukin 4                                    |
| IL5                 | Interleukin 5                                    |
| IL6                 | Interleukin 6                                    |
| IL7                 | Interleukin 7                                    |
| IL8                 | Interleukin 8                                    |
| IL9                 | Interleukin 9                                    |
| IL10                | Interleukin 10                                   |
| IL12                | Interleukin 12                                   |
| IL13                | Interleukin 13                                   |
| IL15                | Interleukin 15                                   |

|                     |                                                               |
|---------------------|---------------------------------------------------------------|
| IL17                | Interleukin 17                                                |
| PDGFBB              | Platelet-derived growth factor BB                             |
| RANTES/CCL5         | Regulated on activation, normal T cell expressed and secreted |
| IP10/CXCL10         | C-X-C motif chemokine ligand 10                               |
| VEGF                | Vascular endothelial growth factor                            |
| MCP1/CCL2           | Monocyte chemoattractant protein-1                            |
| MIP1 $\alpha$ /CCL3 | Macrophage Inflammatory Protein-1 alpha                       |
| MIP1 $\beta$ /CCL4  | Macrophage Inflammatory Protein-1 beta                        |
| TNF $\alpha$        | Tumor necrosis factor alpha                                   |
| INF $\gamma$        | Interferon gamma                                              |

---
